# Supplementary material for: Thermoresponsive “irreversible” property change of POSS-crosslinked PNIPAAm hydrogels
Source: Royal Society of Chemistry journal article supplement (doi:10.1039/d3py00097d), 2023-01-01
Supplement: d3py00097d1.pdf [file d3py00097d1.pdf]

*Electronic Supplementary Information*

**Thermoresponsive “Irreversible” Property Change of POSS-Crosslinked  
PNIPAAm Hydrogels**

*Shohei Ida,<sup>\*a</sup> Tenki Hikida,<sup>a</sup> Atsumi Kawai,<sup>a</sup> Tomonari Matsuda,<sup>a</sup> Souma Suzuki,<sup>a</sup>*

*Hiroaki Imoto,<sup>b</sup> Kensuke Naka,<sup>b</sup> and Shokyoku Kanaoka<sup>\*a</sup>*

a) Department of Materials Science, Faculty of Engineering, The University of Shiga Prefecture,  
2500 Hassaka, Hikone, Shiga 522-8533, Japan

b) Faculty of Molecular Chemistry and Engineering, Graduate School of Science and Technology,  
Kyoto Institute of Technology, Goshokaido-cho, Matsugasaki, Sakyo-ku, Kyoto 606-8585, Japan

Correspondence: [ida.s@mat.usp.ac.jp](mailto:ida.s@mat.usp.ac.jp) (S.I.), and [kanaoka.s@mat.usp.ac.jp](mailto:kanaoka.s@mat.usp.ac.jp) (S.K.)

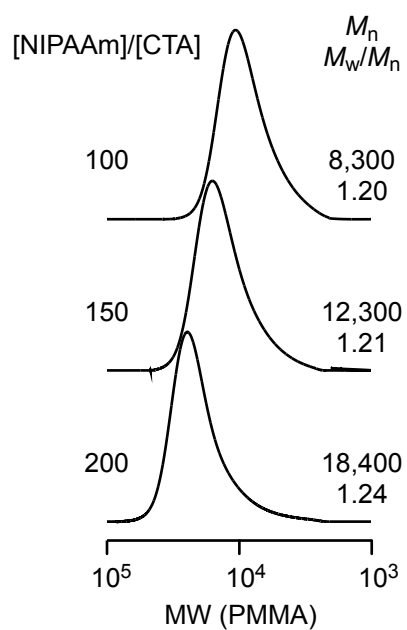

**Fig. S1** SEC curves of PNIPAAm with various molecular weights obtained by RAFT polymerization.

Reaction condition: [NIPAAm] = 2000 mM, [CTA]/[V-501] = 10 in 1,4-dioxane at 60 °C for 25 h.

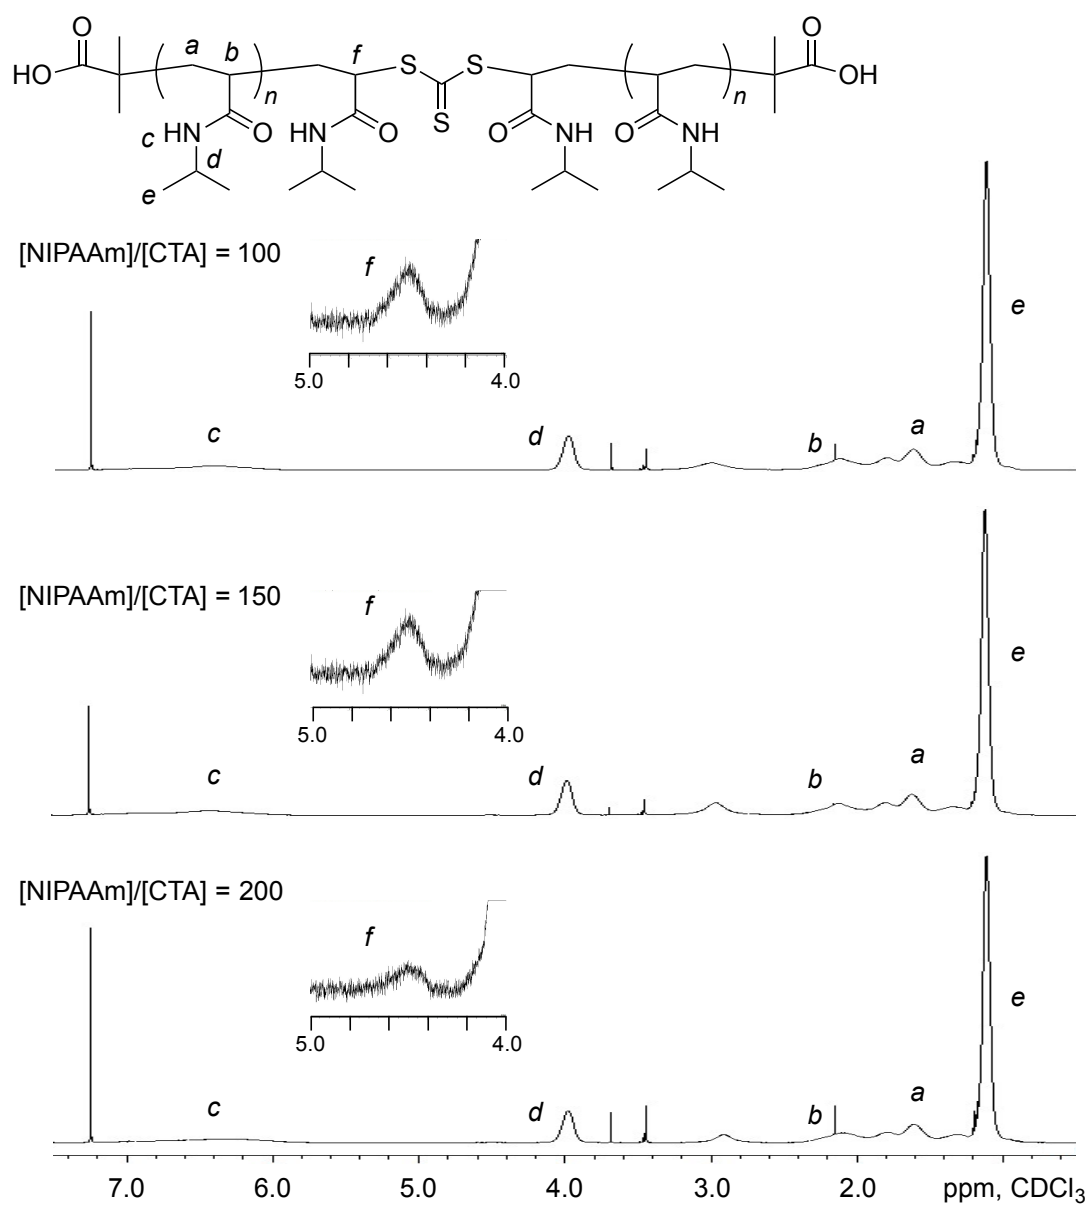

**Fig. S2** <sup>1</sup>H NMR spectra of PNIPAAm obtained by RAFT polymerization. Reaction condition: see Fig. S1. DP<sub>n</sub> and M<sub>n,NMR</sub> were calculated from the ratio of integral values between *d* and *f*.

**Table S1.** RAFT polymerization of NIPAAm.<sup>a</sup>

| Entry | [NIPAAm]/[CTA] | Conv. (%) | DP <sub>n,NMR</sub> | M <sub>n,NMR</sub> | M <sub>w</sub> /M <sub>n,SEC</sub> |
|-------|----------------|-----------|---------------------|--------------------|------------------------------------|
| 1     | 100            | 90        | 102                 | 11,800             | 1.20                               |
| 2     | 150            | 88        | 152                 | 17,500             | 1.21                               |
| 3     | 200            | 78        | 197                 | 22,600             | 1.24                               |

<sup>a</sup> Reaction conditions: see Fig. S1.

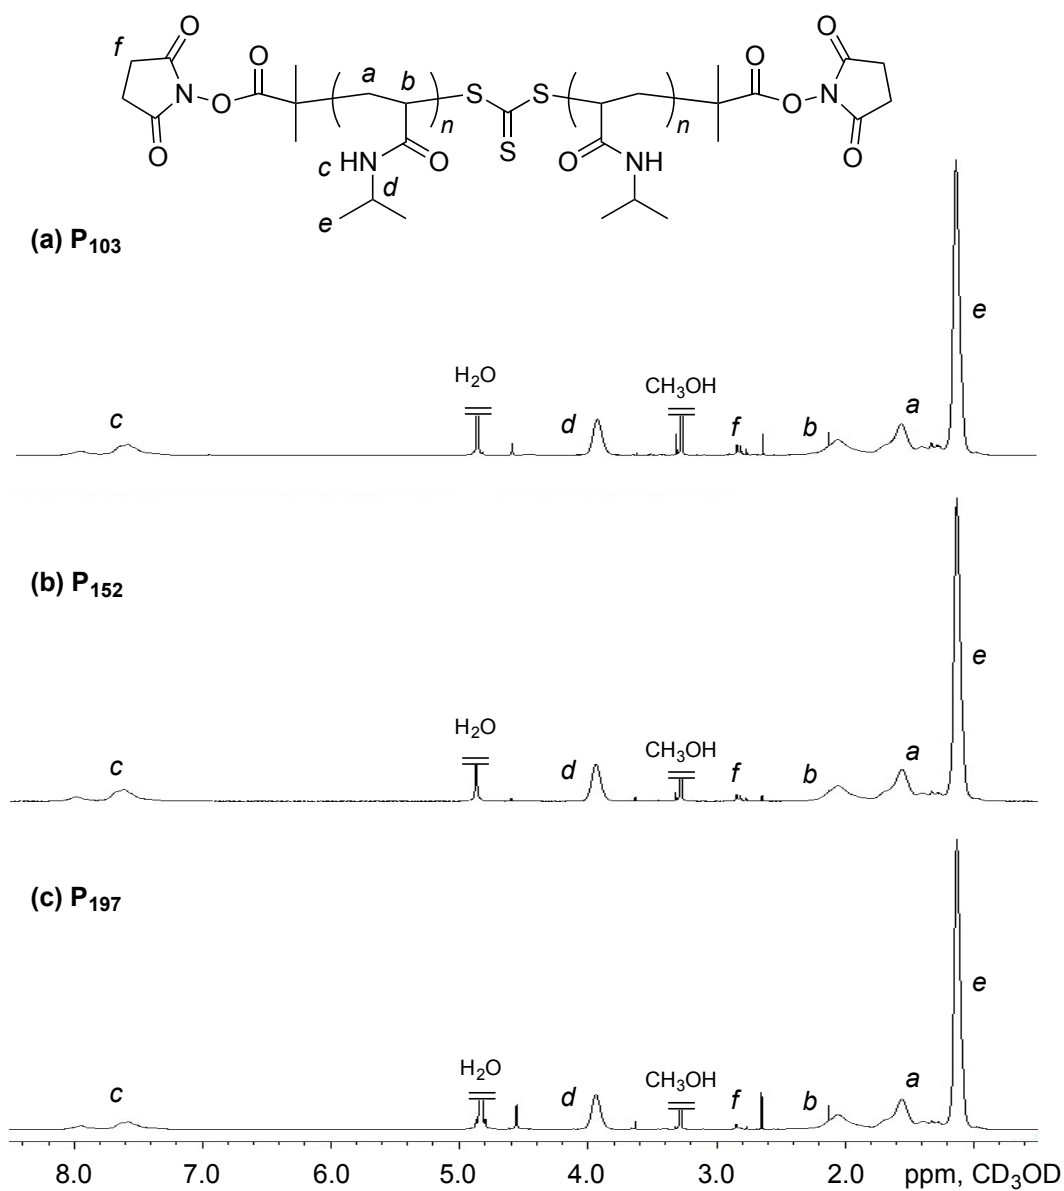

**Fig. S3** <sup>1</sup>H NMR spectra of telechelic PNIPAAms obtained by esterification with NHS. Reaction condition: see Table 1.

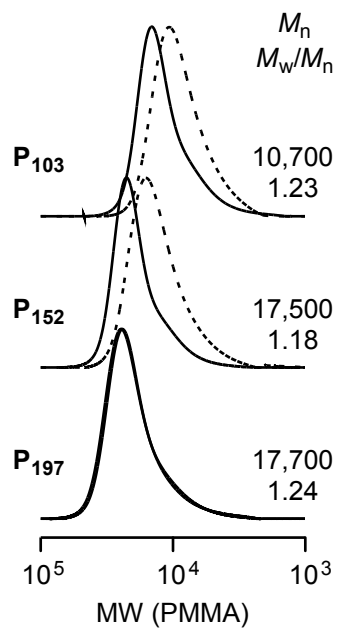

**Fig. S4** SEC curves of telechelic PNIPAAms with activated ester end groups (dashed line: PNIPAAms with carboxy ends). Reaction condition: see Table 1.

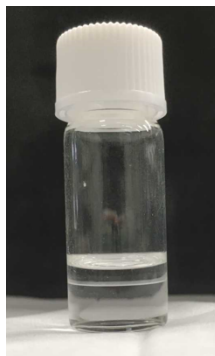

**Fig. S5** Appearance of a mixture of **POSS-CL** (12.5 mM) and **TEA** (2.4 M) in **DMF/H<sub>2</sub>O** (H<sub>2</sub>O: 22 vol%).

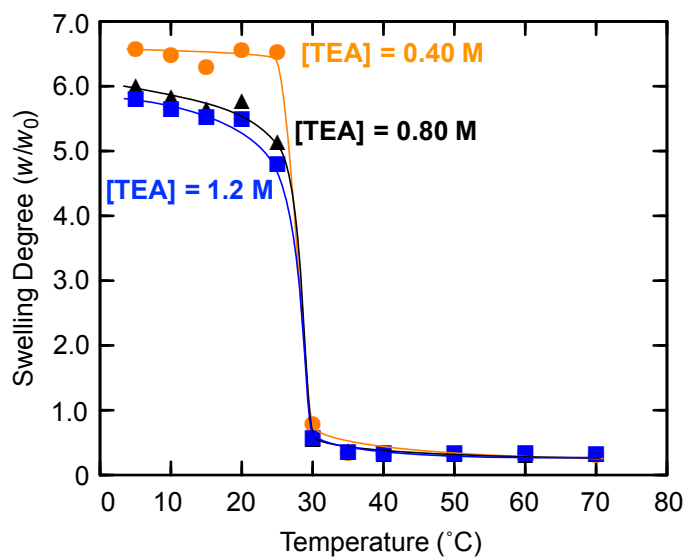

**Fig. S6** Effect of feed TEA concentration on swelling behavior in water of POSS-crosslinked PNIPAAm gels. Reaction condition: see Fig. 3.

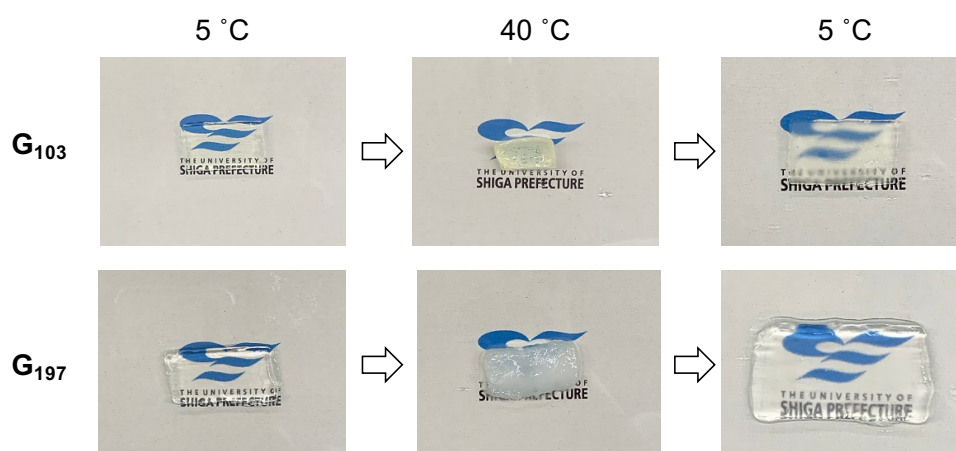

**Fig. S7** Appearance of POSS-crosslinked PNIPAAm gels prepared from prepolymers with different molecular weights against heating/cooling cycle in water.

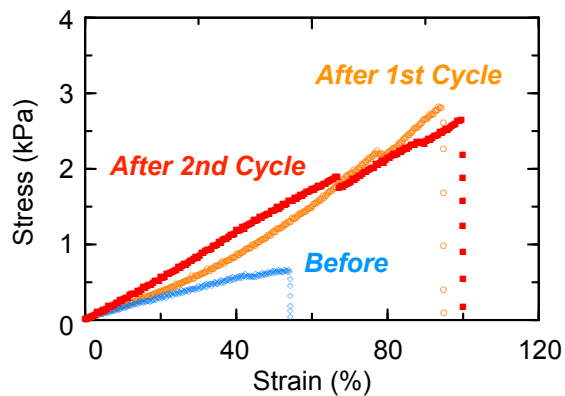

**Fig. S8** Representative stress-strain curve obtained by uniaxial tensile test of  $G_{197}$  after applying 2nd heating/cooling cycle (in red line; Young's modulus:  $2.40 \pm 0.31$  kPa, breaking strain:  $91 \pm 12\%$ ). Blue and orange markers are corresponded to the data in Fig. 5c (before and after applying 1st heating/cooling cycle).

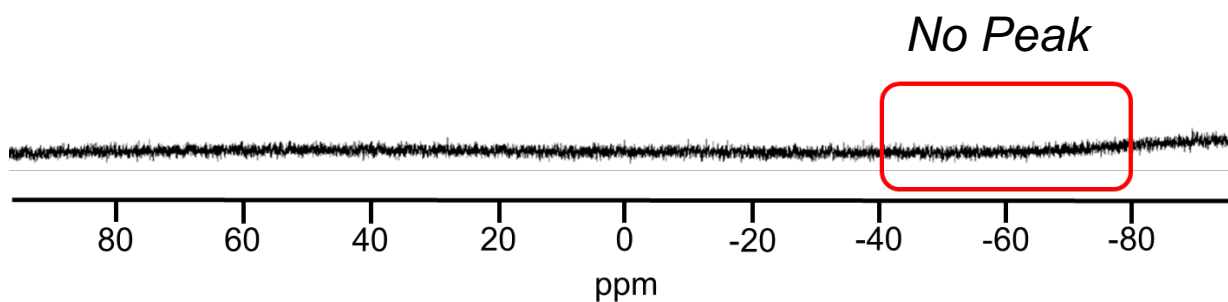

**Fig. S9**  $^{29}\text{Si}$  NMR spectrum of a degradation product from  $G_{103}$ .

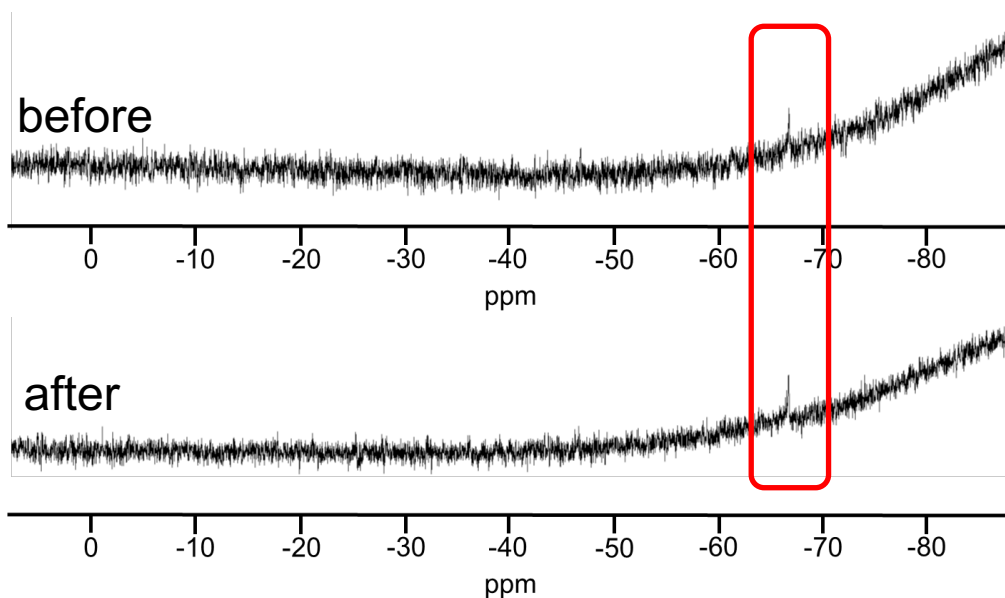

**Fig. S10**  $^{29}\text{Si}$  NMR spectrum of a degradation product from POSS-crosslinked gel prepared with short PNIPAAm ( $\text{DP}_n = 25$ ) before and after applying a heating/cooling cycle.

**Table S2.** Normalized transmittance ( $T_n$ ) of 500 nm light of gel films immersed in various solvents after a heating/cooling cycle.<sup>a</sup>

| Sample                                                | $T_n$ (%)      |
|-------------------------------------------------------|----------------|
| Initial State                                         | $81.7 \pm 6.0$ |
| After a heating/cooling cycle in $\text{H}_2\text{O}$ | $28.4 \pm 1.9$ |
| <hr style="border-top: 1px dashed black;"/>           |                |
| DMSO                                                  | $50.0 \pm 0.8$ |
| DMF                                                   | $41.2 \pm 1.6$ |
| MeOH                                                  | $43.0 \pm 7.7$ |
| 1,4-dioxane                                           | $20.1 \pm 0.8$ |
| THF                                                   | $24.5 \pm 8.6$ |

<sup>a</sup>  $T_n$  was normalized transmittance at the sample thickness of 3.0 mm. The value is calculated from the following equation:  $T_n = T_{\text{exp}}^{d/3}$ , where  $T_{\text{exp}}$  is the transmittance of 500 nm light of gel samples and  $d$  (mm) is the thickness of the sample.



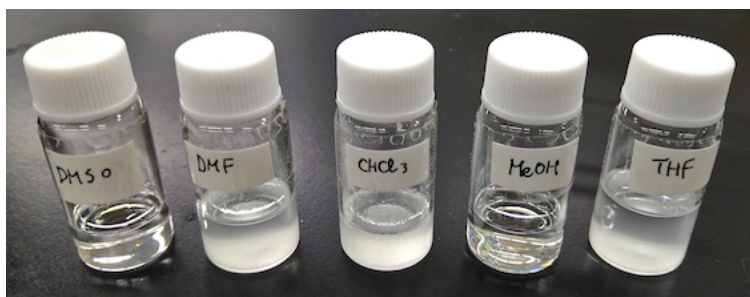

**Fig. S11** Solubility of **POSS-CL** (0.50 wt%) in the presence of excess  $\text{Et}_3\text{N}$  (5 wt%) in various solvents: (from left to right) DMSO, DMF, chloroform, methanol, and THF. **POSS-CL** was well soluble in DMSO and methanol.

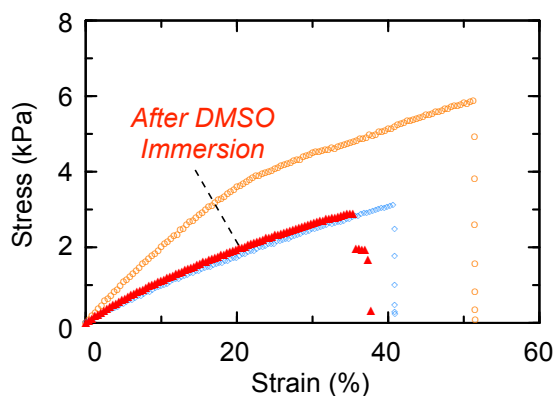

**Fig. S12** Representative stress-strain curve obtained by uniaxial tensile test of  $\text{G}_{103}$  after applying a heating/cooling cycle and immersion in DMSO, followed by the solvent substitution into water (in red line; Young's modulus:  $12.3 \pm 3.1$  kPa, breaking strain:  $35 \pm 16\%$ ). Blue and orange markers are corresponded to the data in Fig. 5a (before and after a heating/cooling cycle, respectively).
